# Supplementary material
Source: PubMed Central journal article supplement (PMC2758057)
Supplement: NIHMS131831-supplement-Supplementary.pdf [file NIHMS131831-supplement-Supplementary.pdf]

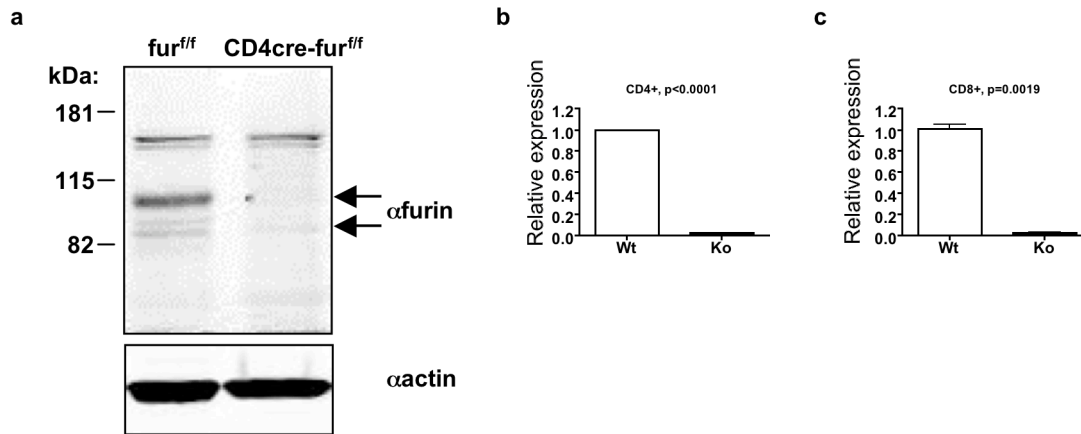

**Supplemental Figure 1. Furin is efficiently deleted in CD4<sup>+</sup> and CD8<sup>+</sup> T cells. a,** Western blot for furin and actin proteins in CD4Cre-fur<sup>f/f</sup> and fur<sup>f/f</sup> Th1 cells. Wild-type and furin deficient CD4<sup>+</sup> cells were cultured in Th1 polarizing conditions for 3 days (plate-bound anti-CD3 and anti-CD28 antibodies, IL-12 10 ng ml<sup>-1</sup>, anti-IL-4 10 $\mu$ g ml<sup>-1</sup>), and then expanded in IL-2 50 U ml<sup>-1</sup> for 3 additional days. Arrows indicate the bands representing furin. The experiment was performed twice with similar results. **b.** Furin mRNA levels. CD4<sup>+</sup> and CD8<sup>+</sup> cells were activated with plate-bound anti-CD3 and CD28 under non-polarizing conditions for 3 days and further expanded for 3 additional days in IL-2. Experiment was performed in duplicate; relative furin mRNA expression levels normalized to 18S house-keeping gene are shown.

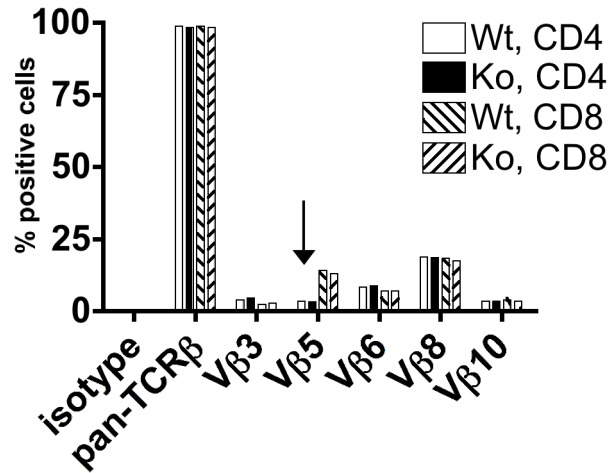

**Supplemental Figure 2. Normal TCR Vβ subsets in the CD4cre-fur<sup>f/f</sup> animals.**

Lymph nodes from 6-week-old CD4cre-fur<sup>f/f</sup> and littermate fur<sup>f/f</sup> animals were stained with CD4, CD8 and isotype control, pan-TCR Vβ and indicated TCR Vβ subset specific antibodies. TCR Vβ subsets were analyzed with flow cytometry. Partial deletion of TCR Vβ5 in wild-type and furin-deficient CD4 cells is indicated with an arrow. A representative experiment of two performed is shown.

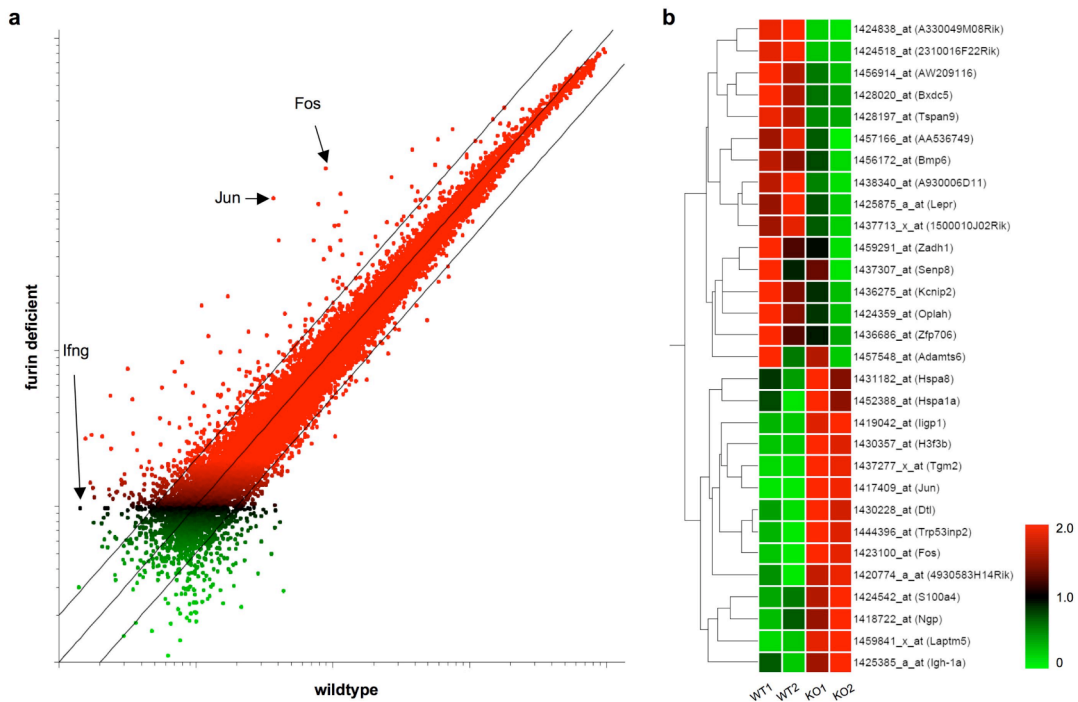

**Supplemental Figure 3. Differential gene expression in naïve wild-type and furin deficient  $CD4^+CD44^{low}CD62L^+$  cells.** **a**, Average expression values of two experiments for each of  $CD4Cre-fur^{f/f}$  and  $fur^{f/f}$  naïve T cells were calculated. A scatter plot view of comparison between  $CD4Cre-fur^{f/f}$  (Y axis) and  $fur^{f/f}$  (X axis) naïve T cells gene expression profiles is shown. The blue lines represent two fold changes. **b**, Hierarchical clustering using Pearson correlation values is shown for the 30 most differentially expressed genes in furin deficient naïve T cells. The color-coding depicts the normalized expression value for each gene (scale 0–2.0, with 1 as the median).

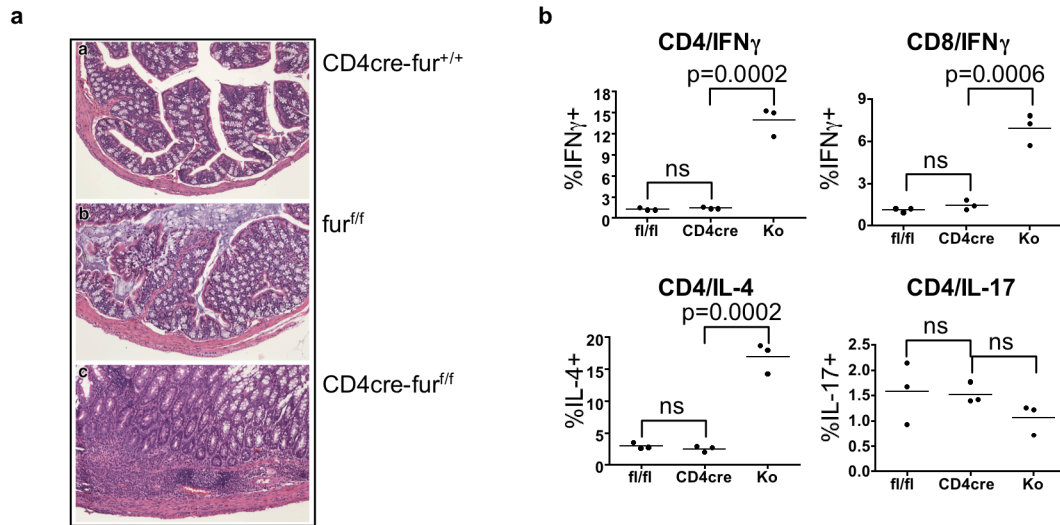

**Supplemental Figure 4. Colon histology and intracellular T cell cytokine production in older CD4cre-fur<sup>+/+</sup> (CD4cre), fur<sup>fl/fl</sup> (fl/fl) and CD4cre-fur<sup>fl/fl</sup> (Ko) mice. a,** Hematoxylin and eosin staining of colons of 7-8 months old mice. **b,** Intracellular cytokine staining. Splenocytes from 7-8 months old mice were activated for 4 h with phorbol myristate acetate and ionomycin, golgiplug (BD Pharmingen) was added to cultures after 2 h. Intracellular staining was done with intracellular cytokine staining kit (BD Pharmingen). Three mice per group were analyzed, ns = not significant.

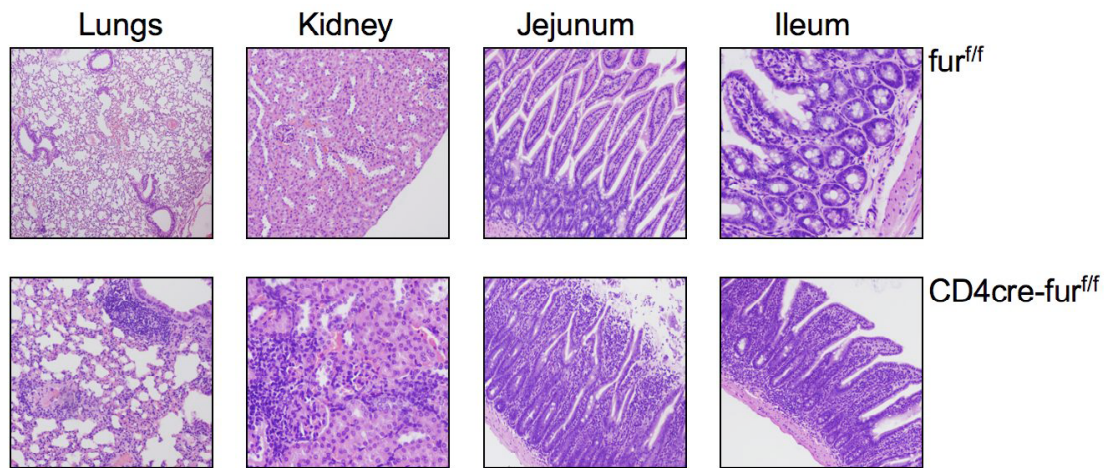

**Supplemental Figure 5. Multifocal autoimmunity disease in CD4cre-fur<sup>f/f</sup> animals.**

Hematoxylin and eosin staining of lungs, kidney, jejunum and ileum of CD4cre-fur<sup>f/f</sup> and littermate fur<sup>f/f</sup> mice at 6 months old.

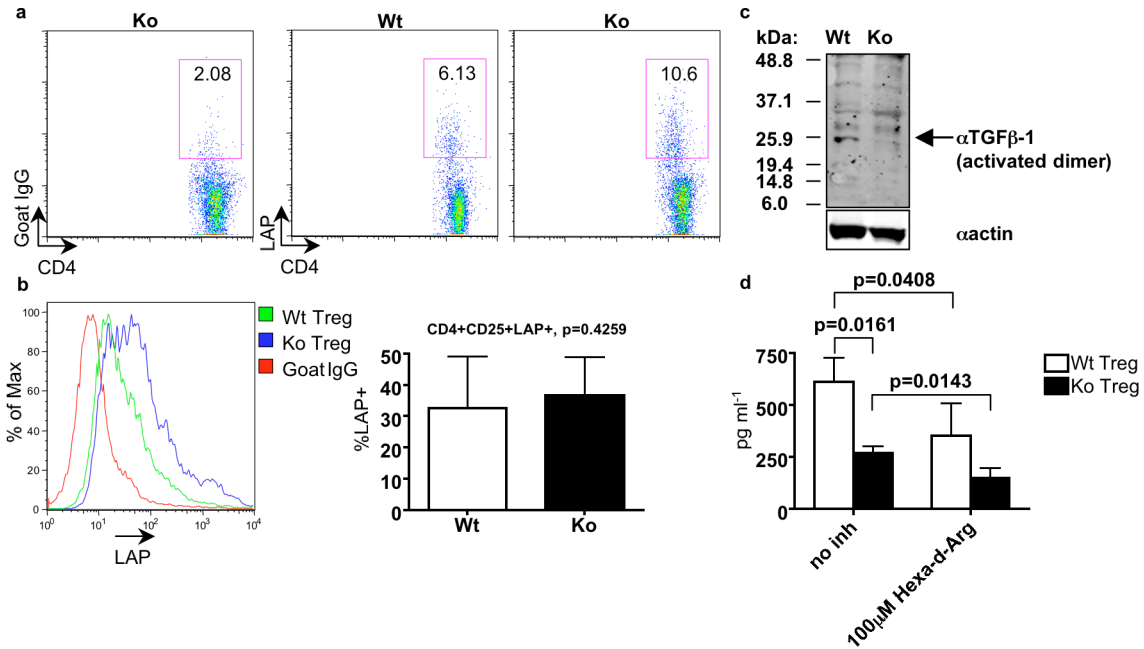

**Supplemental Figure 6. Furin-deficient T cells lack processed, biologically active TGFβ-1, but express normal levels of Latency Associated Peptide on the cell surface.** **a.** Freshly isolated mesenteric lymph nodes from CD4cre-*fur*<sup>f/f</sup> (Ko) and littermate *fur*<sup>f/f</sup> (Wt) were stained for surface expression of CD4 and TGFβ-1 Latency Associated Peptide (LAP) (biotinylated anti-LAP and biotinylated goat IgG purchased from R&D systems) and analyzed by flow cytometry. **b.** Purified wild-type of furin-deficient CD4<sup>+</sup>CD25<sup>+</sup> cells were activated two rounds with plate-bound anti-CD3 (10 μg ml<sup>-1</sup>) and soluble anti-CD28 (2 μg ml<sup>-1</sup>) antibodies as described in the methods. Surface expression of LAP on T cells was analyzed with flow cytometry. One representative experiment and average LAP expression from three independent experiments are shown. **c.** Wild-type and furin-deficient CD4<sup>+</sup> cells were cultured in T regulatory cell inducing (iTreg) conditions for 3 days (plate-bound anti-CD3 10 μg ml<sup>-1</sup> and soluble anti-CD28 2 μg ml<sup>-1</sup> antibodies, IL-2 100 ng ml<sup>-1</sup>, TGFβ-1 5 ng ml<sup>-1</sup>), and then expanded in IL-2 50 U

ml<sup>-1</sup> for 3 additional days. Western blot with antibodies against activated/mature TGFβ-1 (Santa Cruz) and actin was performed (molecular weight of activated/mature TGFβ-1 dimer ~25 kDa). Experiment was performed four times. **d.** Wild-type and furin-deficient T regulatory cells were purified and activated as in **b.** The second activation was done in the presence or absence of furin inhibitor (furin inhibitor II, Calbiochem, Hexa-d-Arg, 100 μM) as indicated. Activated TGFβ-1 was measured in supernatants by ELISA (eBiosciences). Shown is pooled data from two independent experiments.

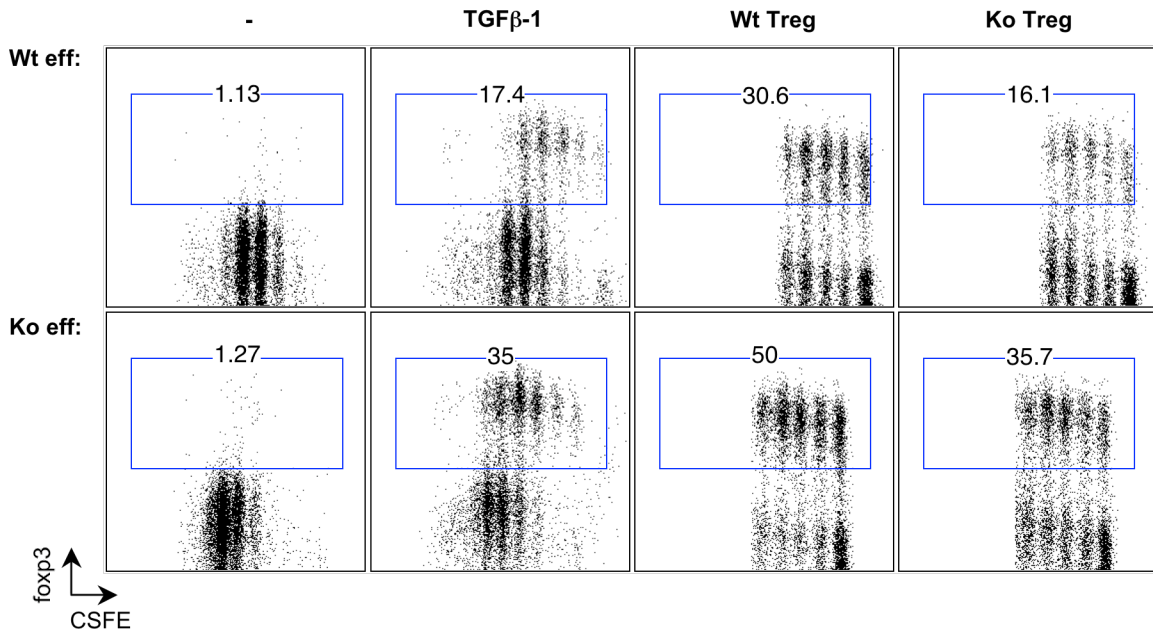

**Supplemental Figure 7. Furin-deficient CD4<sup>+</sup> cells can upregulate Foxp3, but fail to induce Foxp3 in normal T cells.** In vitro conversion assay. Purified wild-type of furin deficient CD4<sup>+</sup>FoxP3<sup>+</sup> T regulatory cells were activated for 4 days with plate-bound anti-CD3 and IL-2 (100 U ml<sup>-1</sup>). The activated Tregs were then co-cultured for an additional 4 days with CFSE-labeled wild-type or furin-deficient CD4<sup>+</sup>Foxp3<sup>-</sup> responder cells in the presence of splenic dendritic cells at a 5:5:1 ratio (CD4<sup>+</sup>Foxp3<sup>+</sup>: CD4<sup>+</sup>Foxp3<sup>-</sup>:splenic dendritic cells), anti-CD3 (2 μg ml<sup>-1</sup>) and IL-2 (100 U ml<sup>-1</sup>) as indicated. Cytokine-induced conversion of wild-type or furin-deficient CD4<sup>+</sup>Foxp3<sup>-</sup> responders was investigated in the absence of Tregs, but in the presence of dendritic cells and exogenous TGFβ-1 (5 ng ml<sup>-1</sup>). CFSE<sup>+</sup> T cells were analyzed for Foxp3 expression using flow cytometry. A representative of three independent experiments performed is shown. When compared to wild-type Tregs, furin-deficient Tregs had in average 51 % reduced ability to convert wild-type effectors into CD4<sup>+</sup>Foxp3<sup>+</sup> cells (three independent experiments, p=0.0498).



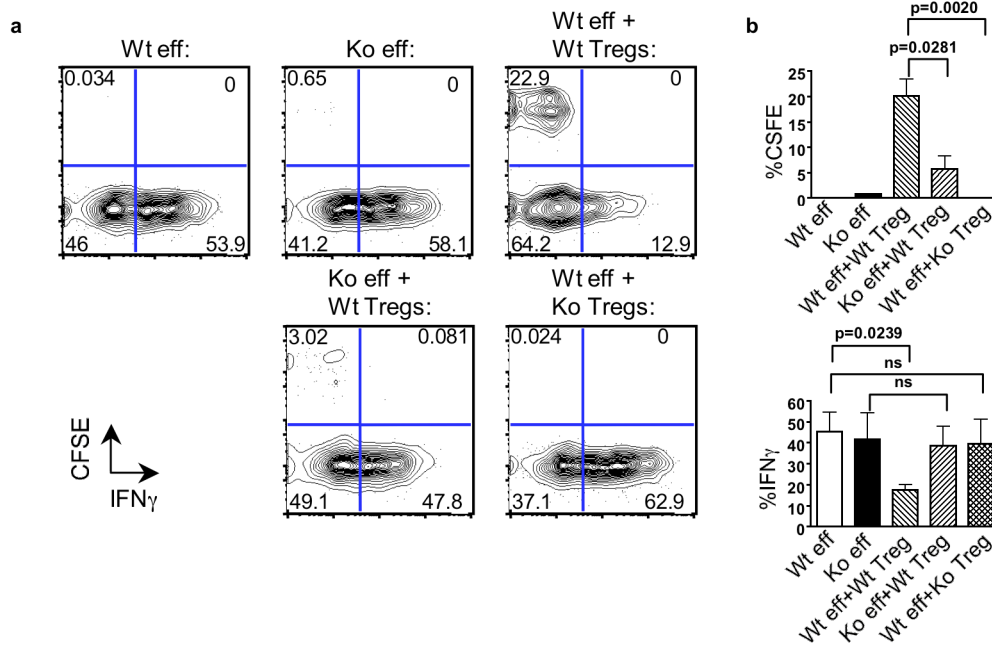

**Supplemental Figure 8. Furin-deficient CD4<sup>+</sup>CD25<sup>+</sup> T regulatory cells have reduced suppressive activity and furin-deficient CD4<sup>+</sup>CD45Rb<sup>hi</sup>CD25<sup>-</sup> effector cells are poorly suppressed *in vivo*.** **a.** and **b.** Wild-type (Wt) or CD4cre-fur<sup>f/f</sup> (Ko) CD4<sup>+</sup>CD45Rb<sup>hi</sup>CD25<sup>-</sup> naïve T cells were purified, labeled with CFSE and transferred alone or in combination with wild-type or furin-deficient CD4<sup>+</sup>CD25<sup>+</sup> T regulatory cells into RAG2<sup>-/-</sup> recipients. On day 7 effector cells were recovered and analyzed for CFSE and intracellular IFN- $\gamma$  expressions on effector cells. Congenic markers CD45.1 and CD45.2 were used to distinguish transferred cell populations. (n = 3 per group, ns= not significant).

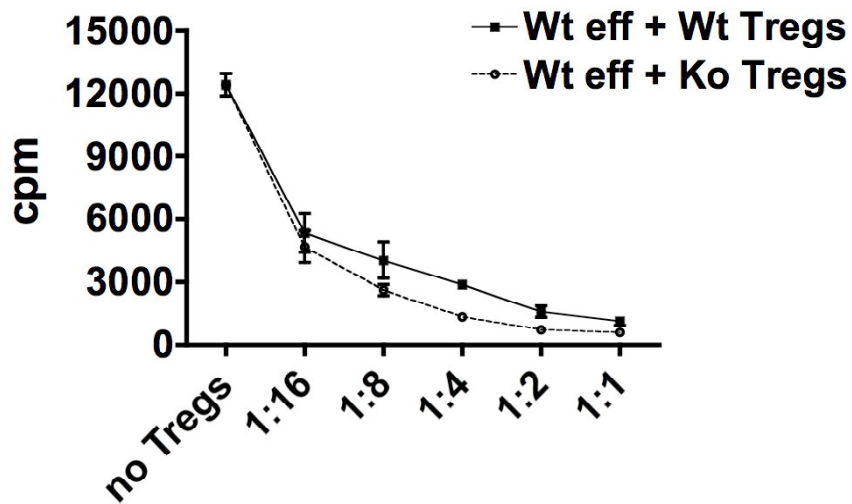

**Supplemental Figure 9. Normal *in vitro* suppressive activity of furin-deficient CD4<sup>+</sup>CD25<sup>+</sup> Treg in cells.** Effector (CD4<sup>+</sup>CD25<sup>-</sup>) cells and Tregs (CD4<sup>+</sup>CD25<sup>+</sup>) were purified by flow cytometry and suppression assay was performed as described<sup>22</sup>. The ratios of Treg cells to CD4<sup>+</sup>CD25<sup>-</sup> effectors are depicted in x-axis (wild-type Treg, filled square, furin-deficient Treg, open circle).
